# Supplementary material
Source: Research Square preprint supplement (doi:10.21203/rs.3.rs-9349889/v1)
Supplement: Supplementary file 1 [file 6fee597f9a7d9746c7450cfb.xlsx]

## Sheet: Supplementary Table S1
Supplementary Table S1. Expanded comparison of the present Colombian PURA cases and selected published studies
Study-level summary prepared for journal submission. Case reports are shown alongside major cohort/series publications. Aggregate frequencies are reproduced as reported in the source study.
Study ID	Study / Case	Year	Country / setting	Study type	Patients (n)	Age at inclusion / last evaluation	Key craniofacial / dysmorphic features	Hypotonia	Developmental delay	Epilepsy	Feeding difficulties	Respiratory involvement	Other relevant features	PURA variant(s)	Source (DOI / URL)
Present-1	Present study (Case 1)	Current	Colombia	Case report	1	22 y	Long face, high-arched palate, prominent nasal bridge	Severe	Severe	Present; generalized tonic-clonic seizures	Not reported	None reported	Autism spectrum disorder, wide-based ataxic gait, stereotypies, scoliosis	c.221A>G (p.Tyr74Cys)	Current manuscript
Present-2	Present study (Case 2)	Current	Colombia	Case report	1	5 y	Broad forehead, epicanthal folds, smooth philtrum, thin upper lip	Severe	Severe	Absent to date	Present	Sleep apnea requiring nocturnal oxygen	Intermittent dystonic posturing, mild frontal hypomyelination, non-verbal, non-ambulant	c.733C>T (p.Arg245*)	Current manuscript
Lopez-Rivera-2022	López-Rivera et al.	2022	Colombia	Case report / structural modeling	1	7 y	Almond-shaped eyes, high hairline, flat philtrum	Severe	Severe	Epileptiform baseline dysfunction reported	Poor sucking ability; oropharyngeal dysphagia	Hypopnea-apnea syndrome; CPAP required	Single palmar crease, flat feet	c.697_699del (p.Phe233del)	https://doi.org/10.3390/brainsci12070871
Mora-Martinez-2024	Mora-Martínez et al.	2024	Colombia	Case report	1	7 y	Flattened nasal bridge, thin upper lip	Severe	Severe	Absent	Severe	Severe respiratory issues	Vitiligo	c.697_699del (p.Phe233del)	https://doi.org/10.3389/fped.2024.1323014
Sinisterra-Diaz-2024	Sinisterra-Díaz et al.	2024	Colombia	Case report	1	7 y	Almond-shaped eyes, high hairline, flat philtrum	Severe	Severe	Present	Oropharyngeal dysphagia	Congenital pneumonia; aspiration	Short stature, hirsutism, spasticity	c.692T>C (p.Phe231Ser)	https://doi.org/10.1159/000541654
Noda-2023	Noda et al.	2023	Japan	Case report	1	9 m	Flat mid-face	Severe	Severe	Not reported	Yes	Yes	Microcephaly	c.175C>T (p.Arg59*)	https://doi.org/10.1002/ccr3.7779
Reijnders-2018	Reijnders et al.	2018	International	Cohort study	47	1-32 y	35/47 with hypotonic facies	47/47 (100%)	47/47 (100%)	32/47 (68%)	40/47 (85%)	20/47 (43%)	Microcephaly in 18/47 (38%)	Multiple; recurrent variants included p.Arg290Cys (~15%), p.Leu137Phe, p.Gly189Asp, p.Ser245Arg	https://doi.org/10.1136/jmedgenet-2017-104946
Johannesen-2021	Johannesen et al.	2021	International	Cohort study	15	4-11 y	12/15 with high forehead or thin vermilion border	15/15 (100%)	Severe	10/15 (67%)	12/15 (80%)	5/15 (33%)	Visual impairment; microcephaly	Multiple; recurrent variants included p.Asn245Ser (~30%), p.Pro194Leu, p.Glu276Lys, p.Arg188Cys	https://doi.org/10.1212/NXG.0000000000000613
Dai-2023	Dai et al.	2023	China	Cohort study	35	Neonatal to 10 y	28/35 with flat nasal bridge	35/35 (100%)	35/35 (100%)	24/35 (69%)	30/35 (86%)	Respiratory distress common	Microcephaly in 15/35 (43%)	Multiple; recurrent variants included p.Ala136Val (~20%), p.Gly154Ser, p.Val300Leu, p.Arg237His	https://doi.org/10.1038/s41431-022-01217-4
Tanaka-2015	Tanaka et al.	2015	Japan	Case series	2	6 months-8 y	High nasal bridge, thin upper lip	Yes	Severe	Absent	Severe dysphagia	Intermittent apnea	Spasticity; contractures	c.594C>T (p.Gln198*); c.314C>T (p.Thr105Ile)	https://doi.org/10.1101/mcs.a000356
Hunt-2014	Hunt et al.	2014	USA / international recruitment	Case series	3	3-12 y	Mild facial dysmorphisms	Yes	Severe	Focal seizures	Recurrent choking	Chronic lung disease	Scoliosis; hypermobility	c.274G>A (p.Val92Met); c.758G>A (p.Ser253Asn)	https://doi.org/10.1136/jmedgenet-2014-102798
Lalani-2014	Lalani et al.	2014	USA	Case series	4	Neonatal to 6 y	Round face; micrognathia	Yes	Severe	Generalized seizures	Poor feeding	Respiratory distress	Congenital heart defect	5q31.3 microdeletions involving PURA; c.512del (p.Asn171fs); c.879G>A (p.Lys293*)	https://doi.org/10.1016/j.ajhg.2014.09.014
Abbreviations: CPAP, continuous positive airway pressure; y, years; m, months.
For cohort studies, entries summarize study-level frequencies rather than individual patient-level records.

## Sheet: Reference list
Ref no.	Citation	DOI / URL
1	Current manuscript: Clinical and Genetic Characterization of Two Colombian Patients with PURA Syndrome
2	López-Rivera JJ et al. Structural Protein Effects Underpinning Cognitive Developmental Delay of the PURA p.Phe233del Mutation...	https://doi.org/10.3390/brainsci12070871
3	Mora-Martínez S et al. Expanding the phenotypic spectrum of PURA syndrome in South America with the first presentation of concurrent vitiligo.	https://doi.org/10.3389/fped.2024.1323014
4	Sinisterra-Díaz SE et al. A Colombian Boy with a Novel de novo PURA Variant: A Case Report.	https://doi.org/10.1159/000541654
5	Noda Y et al. Heterozygous c.175C>T variant in PURA gene causes severe developmental delay.	https://doi.org/10.1002/ccr3.7779
6	Reijnders MRF et al. PURA syndrome: Clinical delineation and genotype-phenotype study in 32 individuals with review of published literature.	https://doi.org/10.1136/jmedgenet-2017-104946
7	Johannesen KM et al. PURA-Related Developmental and Epileptic Encephalopathy: Phenotypic and Genotypic Spectrum.	https://doi.org/10.1212/NXG.0000000000000613
8	Dai W et al. A 25 Mainland Chinese cohort of patients with PURA-related neurodevelopmental disorders: clinical delineation and genotype-phenotype correlations.	https://doi.org/10.1038/s41431-022-01217-4
9	Tanaka AJ et al. De novo mutations in PURA are associated with hypotonia and developmental delay.	https://doi.org/10.1101/mcs.a000356
10	Hunt D et al. Whole exome sequencing in family trios reveals de novo mutations in PURA as a cause of severe neurodevelopmental delay and learning disability.	https://doi.org/10.1136/jmedgenet-2014-102798
11	Lalani SR et al. Mutations in PURA cause profound neonatal hypotonia, seizures, and encephalopathy in 5q31.3 microdeletion syndrome.	https://doi.org/10.1016/j.ajhg.2014.09.014
